# Supplementary material
Source: publisher site journal article supplement (https://www.spandidos-publications.com/679/downloadSupplementary)
Supplement: Supplementary file 1 [file downloadSupplementary]

## Sheet: Quantitative Results
Skyline analysis of target peptide PRM data
Peptide Sequence	Protein Name	Replicate Name	Precursor Mz	Precursor Charge	Product Mz	Product Charge	Fragment Ion	Retention Time	Area
SSDQPLTVPVSPK	Q9ULW0	C_1	677.864	2	937.572	1	y9	31.09	6813799
SSDQPLTVPVSPK	Q9ULW0	C_2	677.864	2	937.572	1	y9	31	3958837
SSDQPLTVPVSPK	Q9ULW0	C_3	677.864	2	937.572	1	y9	29.85	9229690
SSDQPLTVPVSPK	Q9ULW0	ACBP_1	677.864	2	937.572	1	y9	30.53	8101861
SSDQPLTVPVSPK	Q9ULW0	ACBP_2	677.864	2	937.572	1	y9	29.78	6227715
SSDQPLTVPVSPK	Q9ULW0	ACBP_3	677.864	2	937.572	1	y9	30.16	8737538
SSDQPLTVPVSPK	Q9ULW0	O-A_1	677.864	2	937.572	1	y9	30.53	4877722
SSDQPLTVPVSPK	Q9ULW0	O-A_2	677.864	2	937.572	1	y9	31.19	3863387
SSDQPLTVPVSPK	Q9ULW0	O-A_3	677.864	2	937.572	1	y9	31.19	4248245
SSDQPLTVPVSPK	Q9ULW0	OXA_1	677.864	2	937.572	1	y9	29.97	14547710
SSDQPLTVPVSPK	Q9ULW0	OXA_2	677.864	2	937.572	1	y9	30.44	14601608
SSDQPLTVPVSPK	Q9ULW0	OXA_3	677.864	2	937.572	1	y9	29.91	14921942
SSDQPLTVPVSPK	Q9ULW0	C_1	677.864	2	727.435	1	y7	31.09	1339994
SSDQPLTVPVSPK	Q9ULW0	C_2	677.864	2	727.435	1	y7	31	901343
SSDQPLTVPVSPK	Q9ULW0	C_3	677.864	2	727.435	1	y7	29.85	2305427
SSDQPLTVPVSPK	Q9ULW0	ACBP_1	677.864	2	727.435	1	y7	30.53	1799111
SSDQPLTVPVSPK	Q9ULW0	ACBP_2	677.864	2	727.435	1	y7	29.69	1328814
SSDQPLTVPVSPK	Q9ULW0	ACBP_3	677.864	2	727.435	1	y7	30.16	2103830
SSDQPLTVPVSPK	Q9ULW0	O-A_1	677.864	2	727.435	1	y7	30.44	1048820
SSDQPLTVPVSPK	Q9ULW0	O-A_2	677.864	2	727.435	1	y7	31.19	867466
SSDQPLTVPVSPK	Q9ULW0	O-A_3	677.864	2	727.435	1	y7	31.28	872451
SSDQPLTVPVSPK	Q9ULW0	OXA_1	677.864	2	727.435	1	y7	29.97	3612397
SSDQPLTVPVSPK	Q9ULW0	OXA_2	677.864	2	727.435	1	y7	30.44	3308149
SSDQPLTVPVSPK	Q9ULW0	OXA_3	677.864	2	727.435	1	y7	29.91	3963309
SSDQPLTVPVSPK	Q9ULW0	C_1	677.864	2	527.319	1	y5	31.09	5455228
SSDQPLTVPVSPK	Q9ULW0	C_2	677.864	2	527.319	1	y5	31	3120353
SSDQPLTVPVSPK	Q9ULW0	C_3	677.864	2	527.319	1	y5	29.85	8238864
SSDQPLTVPVSPK	Q9ULW0	ACBP_1	677.864	2	527.319	1	y5	30.62	6735705
SSDQPLTVPVSPK	Q9ULW0	ACBP_2	677.864	2	527.319	1	y5	29.78	5315238
SSDQPLTVPVSPK	Q9ULW0	ACBP_3	677.864	2	527.319	1	y5	30.16	7155561
SSDQPLTVPVSPK	Q9ULW0	O-A_1	677.864	2	527.319	1	y5	30.44	4609549
SSDQPLTVPVSPK	Q9ULW0	O-A_2	677.864	2	527.319	1	y5	31.19	3100759
SSDQPLTVPVSPK	Q9ULW0	O-A_3	677.864	2	527.319	1	y5	31.19	3458796
SSDQPLTVPVSPK	Q9ULW0	OXA_1	677.864	2	527.319	1	y5	30.06	12834021
SSDQPLTVPVSPK	Q9ULW0	OXA_2	677.864	2	527.319	1	y5	30.44	12106496
SSDQPLTVPVSPK	Q9ULW0	OXA_3	677.864	2	527.319	1	y5	29.91	13118535
DPQTPVLQTK	Q9ULW0	C_1	563.809	2	786.472	1	y7	22.58	884556
DPQTPVLQTK	Q9ULW0	C_2	563.809	2	786.472	1	y7	22.49	990930
DPQTPVLQTK	Q9ULW0	C_3	563.809	2	786.472	1	y7	21.67	1291514
DPQTPVLQTK	Q9ULW0	ACBP_1	563.809	2	786.472	1	y7	22.21	2088381
DPQTPVLQTK	Q9ULW0	ACBP_2	563.809	2	786.472	1	y7	21.64	1783972
DPQTPVLQTK	Q9ULW0	ACBP_3	563.809	2	786.472	1	y7	21.83	1979358
DPQTPVLQTK	Q9ULW0	O-A_1	563.809	2	786.472	1	y7	22.11	669524
DPQTPVLQTK	Q9ULW0	O-A_2	563.809	2	786.472	1	y7	22.67	849090
DPQTPVLQTK	Q9ULW0	O-A_3	563.809	2	786.472	1	y7	22.67	674565
DPQTPVLQTK	Q9ULW0	OXA_1	563.809	2	786.472	1	y7	21.83	2997397
DPQTPVLQTK	Q9ULW0	OXA_2	563.809	2	786.472	1	y7	22.02	3718676
DPQTPVLQTK	Q9ULW0	OXA_3	563.809	2	786.472	1	y7	21.55	3401787
DPQTPVLQTK	Q9ULW0	C_1	563.809	2	685.424	1	y6	22.58	2139710
DPQTPVLQTK	Q9ULW0	C_2	563.809	2	685.424	1	y6	22.49	2726121
DPQTPVLQTK	Q9ULW0	C_3	563.809	2	685.424	1	y6	21.57	3862734
DPQTPVLQTK	Q9ULW0	ACBP_1	563.809	2	685.424	1	y6	22.21	5602028
DPQTPVLQTK	Q9ULW0	ACBP_2	563.809	2	685.424	1	y6	21.64	5326231
DPQTPVLQTK	Q9ULW0	ACBP_3	563.809	2	685.424	1	y6	21.83	5661258
DPQTPVLQTK	Q9ULW0	O-A_1	563.809	2	685.424	1	y6	22.11	1670257
DPQTPVLQTK	Q9ULW0	O-A_2	563.809	2	685.424	1	y6	22.77	1873749
DPQTPVLQTK	Q9ULW0	O-A_3	563.809	2	685.424	1	y6	22.77	1875371
DPQTPVLQTK	Q9ULW0	OXA_1	563.809	2	685.424	1	y6	21.83	8705841
DPQTPVLQTK	Q9ULW0	OXA_2	563.809	2	685.424	1	y6	22.02	10225734
DPQTPVLQTK	Q9ULW0	OXA_3	563.809	2	685.424	1	y6	21.64	9039942
DPQTPVLQTK	Q9ULW0	C_1	563.809	2	588.372	1	y5	21.83	0
DPQTPVLQTK	Q9ULW0	C_2	563.809	2	588.372	1	y5	22.86	16825
DPQTPVLQTK	Q9ULW0	C_3	563.809	2	588.372	1	y5	21.29	156176
DPQTPVLQTK	Q9ULW0	ACBP_1	563.809	2	588.372	1	y5	22.11	393279
DPQTPVLQTK	Q9ULW0	ACBP_2	563.809	2	588.372	1	y5	21.64	328616
DPQTPVLQTK	Q9ULW0	ACBP_3	563.809	2	588.372	1	y5	21.83	210413
DPQTPVLQTK	Q9ULW0	O-A_1	563.809	2	588.372	1	y5	22.21	60637
DPQTPVLQTK	Q9ULW0	O-A_2	563.809	2	588.372	1	y5	22.3	0
DPQTPVLQTK	Q9ULW0	O-A_3	563.809	2	588.372	1	y5	22.77	21192
DPQTPVLQTK	Q9ULW0	OXA_1	563.809	2	588.372	1	y5	21.83	423614
DPQTPVLQTK	Q9ULW0	OXA_2	563.809	2	588.372	1	y5	22.02	368064
DPQTPVLQTK	Q9ULW0	OXA_3	563.809	2	588.372	1	y5	21.74	494560
LSVASTPISQR	A8K4B4	C_1	579.827	2	859.463	1	y8	27.45	1063035
LSVASTPISQR	A8K4B4	C_2	579.827	2	859.463	1	y8	27.26	1809375
LSVASTPISQR	A8K4B4	C_3	579.827	2	859.463	1	y8	26.18	3252053
LSVASTPISQR	A8K4B4	ACBP_1	579.827	2	859.463	1	y8	26.89	6134824
LSVASTPISQR	A8K4B4	ACBP_2	579.827	2	859.463	1	y8	26.33	5571985
LSVASTPISQR	A8K4B4	ACBP_3	579.827	2	859.463	1	y8	26.42	7032506
LSVASTPISQR	A8K4B4	O-A_1	579.827	2	859.463	1	y8	26.7	1581940
LSVASTPISQR	A8K4B4	O-A_2	579.827	2	859.463	1	y8	27.64	1954250
LSVASTPISQR	A8K4B4	O-A_3	579.827	2	859.463	1	y8	27.45	1854298
LSVASTPISQR	A8K4B4	OXA_1	579.827	2	859.463	1	y8	26.51	5233509
LSVASTPISQR	A8K4B4	OXA_2	579.827	2	859.463	1	y8	26.7	4462329
LSVASTPISQR	A8K4B4	OXA_3	579.827	2	859.463	1	y8	26.34	5160247
LSVASTPISQR	A8K4B4	C_1	579.827	2	788.426	1	y7	27.45	1104492
LSVASTPISQR	A8K4B4	C_2	579.827	2	788.426	1	y7	26.61	1468124
LSVASTPISQR	A8K4B4	C_3	579.827	2	788.426	1	y7	26.28	4864557
LSVASTPISQR	A8K4B4	ACBP_1	579.827	2	788.426	1	y7	26.89	6924501
LSVASTPISQR	A8K4B4	ACBP_2	579.827	2	788.426	1	y7	26.23	6016227
LSVASTPISQR	A8K4B4	ACBP_3	579.827	2	788.426	1	y7	26.42	6530674
LSVASTPISQR	A8K4B4	O-A_1	579.827	2	788.426	1	y7	26.7	1585107
LSVASTPISQR	A8K4B4	O-A_2	579.827	2	788.426	1	y7	27.64	2423843
LSVASTPISQR	A8K4B4	O-A_3	579.827	2	788.426	1	y7	26.89	1016828
LSVASTPISQR	A8K4B4	OXA_1	579.827	2	788.426	1	y7	26.51	5858006
LSVASTPISQR	A8K4B4	OXA_2	579.827	2	788.426	1	y7	26.7	5093095
LSVASTPISQR	A8K4B4	OXA_3	579.827	2	788.426	1	y7	26.34	5904169
LSVASTPISQR	A8K4B4	C_1	579.827	2	600.346	1	y5	27.45	1057533
LSVASTPISQR	A8K4B4	C_2	579.827	2	600.346	1	y5	27.26	1467615
LSVASTPISQR	A8K4B4	C_3	579.827	2	600.346	1	y5	26.18	2353950
LSVASTPISQR	A8K4B4	ACBP_1	579.827	2	600.346	1	y5	26.89	7711221
LSVASTPISQR	A8K4B4	ACBP_2	579.827	2	600.346	1	y5	26.23	5875675
LSVASTPISQR	A8K4B4	ACBP_3	579.827	2	600.346	1	y5	26.42	7304430
LSVASTPISQR	A8K4B4	O-A_1	579.827	2	600.346	1	y5	26.7	1617478
LSVASTPISQR	A8K4B4	O-A_2	579.827	2	600.346	1	y5	27.64	1450604
LSVASTPISQR	A8K4B4	O-A_3	579.827	2	600.346	1	y5	27.45	1194010
LSVASTPISQR	A8K4B4	OXA_1	579.827	2	600.346	1	y5	26.51	4962880
LSVASTPISQR	A8K4B4	OXA_2	579.827	2	600.346	1	y5	26.7	4787632
LSVASTPISQR	A8K4B4	OXA_3	579.827	2	600.346	1	y5	26.34	5723226
HVDYVADQIVTK	P11388	C_1	694.364	2	1250.66	1	y11	28.86	3759923
HVDYVADQIVTK	P11388	C_2	694.364	2	1250.66	1	y11	28.68	3344709
HVDYVADQIVTK	P11388	C_3	694.364	2	1250.66	1	y11	27.42	8176283
HVDYVADQIVTK	P11388	ACBP_1	694.364	2	1250.66	1	y11	28.12	5695468
HVDYVADQIVTK	P11388	ACBP_2	694.364	2	1250.66	1	y11	27.37	5649025
HVDYVADQIVTK	P11388	ACBP_3	694.364	2	1250.66	1	y11	27.46	5315775
HVDYVADQIVTK	P11388	O-A_1	694.364	2	1250.66	1	y11	28.21	6596242
HVDYVADQIVTK	P11388	O-A_2	694.364	2	1250.66	1	y11	29.05	4508837
HVDYVADQIVTK	P11388	O-A_3	694.364	2	1250.66	1	y11	29.05	5115094
HVDYVADQIVTK	P11388	OXA_1	694.364	2	1250.66	1	y11	27.65	7607023
HVDYVADQIVTK	P11388	OXA_2	694.364	2	1250.66	1	y11	27.93	5412840
HVDYVADQIVTK	P11388	OXA_3	694.364	2	1250.66	1	y11	27.48	7190955
HVDYVADQIVTK	P11388	C_1	694.364	2	1151.59	1	y10	28.86	11398653
HVDYVADQIVTK	P11388	C_2	694.364	2	1151.59	1	y10	28.68	10509633
HVDYVADQIVTK	P11388	C_3	694.364	2	1151.59	1	y10	27.42	24150864
HVDYVADQIVTK	P11388	ACBP_1	694.364	2	1151.59	1	y10	28.12	18832944
HVDYVADQIVTK	P11388	ACBP_2	694.364	2	1151.59	1	y10	27.37	17086582
HVDYVADQIVTK	P11388	ACBP_3	694.364	2	1151.59	1	y10	27.46	17879196
HVDYVADQIVTK	P11388	O-A_1	694.364	2	1151.59	1	y10	28.21	20193460
HVDYVADQIVTK	P11388	O-A_2	694.364	2	1151.59	1	y10	29.05	14262276
HVDYVADQIVTK	P11388	O-A_3	694.364	2	1151.59	1	y10	29.05	16319614
HVDYVADQIVTK	P11388	OXA_1	694.364	2	1151.59	1	y10	27.65	23928754
HVDYVADQIVTK	P11388	OXA_2	694.364	2	1151.59	1	y10	27.93	18680452
HVDYVADQIVTK	P11388	OXA_3	694.364	2	1151.59	1	y10	27.48	22757672
HVDYVADQIVTK	P11388	C_1	694.364	2	774.436	1	y7	28.86	3200052
HVDYVADQIVTK	P11388	C_2	694.364	2	774.436	1	y7	28.68	3040042
HVDYVADQIVTK	P11388	C_3	694.364	2	774.436	1	y7	27.42	7307782
HVDYVADQIVTK	P11388	ACBP_1	694.364	2	774.436	1	y7	28.12	6138163
HVDYVADQIVTK	P11388	ACBP_2	694.364	2	774.436	1	y7	27.37	5824971
HVDYVADQIVTK	P11388	ACBP_3	694.364	2	774.436	1	y7	27.46	5916419
HVDYVADQIVTK	P11388	O-A_1	694.364	2	774.436	1	y7	28.21	6049224
HVDYVADQIVTK	P11388	O-A_2	694.364	2	774.436	1	y7	29.05	4400516
HVDYVADQIVTK	P11388	O-A_3	694.364	2	774.436	1	y7	29.05	4780709
HVDYVADQIVTK	P11388	OXA_1	694.364	2	774.436	1	y7	27.65	7637877
HVDYVADQIVTK	P11388	OXA_2	694.364	2	774.436	1	y7	27.93	5985292
HVDYVADQIVTK	P11388	OXA_3	694.364	2	774.436	1	y7	27.48	7233333
AANILVGENLVCK	B2RA70	C_1	700.882	2	1144.64	1	y10	43.56	436315
AANILVGENLVCK	B2RA70	C_2	700.882	2	1144.64	1	y10	43.47	510837
AANILVGENLVCK	B2RA70	C_3	700.882	2	1144.64	1	y10	42.1	1506699
AANILVGENLVCK	B2RA70	ACBP_1	700.882	2	1144.64	1	y10	43	788313
AANILVGENLVCK	B2RA70	ACBP_2	700.882	2	1144.64	1	y10	41.78	708774
AANILVGENLVCK	B2RA70	ACBP_3	700.882	2	1144.64	1	y10	42.35	902510
AANILVGENLVCK	B2RA70	O-A_1	700.882	2	1144.64	1	y10	42.91	1202888
AANILVGENLVCK	B2RA70	O-A_2	700.882	2	1144.64	1	y10	43.75	502040
AANILVGENLVCK	B2RA70	O-A_3	700.882	2	1144.64	1	y10	43.75	627930
AANILVGENLVCK	B2RA70	OXA_1	700.882	2	1144.64	1	y10	42.25	705956
AANILVGENLVCK	B2RA70	OXA_2	700.882	2	1144.64	1	y10	42.81	671923
AANILVGENLVCK	B2RA70	OXA_3	700.882	2	1144.64	1	y10	42.43	680599
AANILVGENLVCK	B2RA70	C_1	700.882	2	918.471	1	y8	43.56	4921238
AANILVGENLVCK	B2RA70	C_2	700.882	2	918.471	1	y8	43.47	5583957
AANILVGENLVCK	B2RA70	C_3	700.882	2	918.471	1	y8	42.1	13734582
AANILVGENLVCK	B2RA70	ACBP_1	700.882	2	918.471	1	y8	43	7929399
AANILVGENLVCK	B2RA70	ACBP_2	700.882	2	918.471	1	y8	41.78	7356786
AANILVGENLVCK	B2RA70	ACBP_3	700.882	2	918.471	1	y8	42.35	10162684
AANILVGENLVCK	B2RA70	O-A_1	700.882	2	918.471	1	y8	42.91	12027741
AANILVGENLVCK	B2RA70	O-A_2	700.882	2	918.471	1	y8	43.75	6756178
AANILVGENLVCK	B2RA70	O-A_3	700.882	2	918.471	1	y8	43.75	8573791
AANILVGENLVCK	B2RA70	OXA_1	700.882	2	918.471	1	y8	42.35	7198999
AANILVGENLVCK	B2RA70	OXA_2	700.882	2	918.471	1	y8	42.81	7961812
AANILVGENLVCK	B2RA70	OXA_3	700.882	2	918.471	1	y8	42.43	9647254
AANILVGENLVCK	B2RA70	C_1	700.882	2	819.403	1	y7	43.56	5577662
AANILVGENLVCK	B2RA70	C_2	700.882	2	819.403	1	y7	43.47	5767735
AANILVGENLVCK	B2RA70	C_3	700.882	2	819.403	1	y7	42.1	14799219
AANILVGENLVCK	B2RA70	ACBP_1	700.882	2	819.403	1	y7	43	9715355
AANILVGENLVCK	B2RA70	ACBP_2	700.882	2	819.403	1	y7	41.78	7743673
AANILVGENLVCK	B2RA70	ACBP_3	700.882	2	819.403	1	y7	42.35	11253364
AANILVGENLVCK	B2RA70	O-A_1	700.882	2	819.403	1	y7	42.91	13815812
AANILVGENLVCK	B2RA70	O-A_2	700.882	2	819.403	1	y7	43.75	7239905
AANILVGENLVCK	B2RA70	O-A_3	700.882	2	819.403	1	y7	43.75	9440207
AANILVGENLVCK	B2RA70	OXA_1	700.882	2	819.403	1	y7	42.35	8050343
AANILVGENLVCK	B2RA70	OXA_2	700.882	2	819.403	1	y7	42.72	9086055
AANILVGENLVCK	B2RA70	OXA_3	700.882	2	819.403	1	y7	42.43	10076088
AQFDTLQK	B2RA70	C_1	475.751	2	751.398	1	y6	23.72	1816491
AQFDTLQK	B2RA70	C_2	475.751	2	751.398	1	y6	23.72	3028113
AQFDTLQK	B2RA70	C_3	475.751	2	751.398	1	y6	22.16	6817264
AQFDTLQK	B2RA70	ACBP_1	475.751	2	751.398	1	y6	22.88	3924127
AQFDTLQK	B2RA70	ACBP_2	475.751	2	751.398	1	y6	22.32	3781642
AQFDTLQK	B2RA70	ACBP_3	475.751	2	751.398	1	y6	22.32	2869363
AQFDTLQK	B2RA70	O-A_1	475.751	2	751.398	1	y6	23.07	5000292
AQFDTLQK	B2RA70	O-A_2	475.751	2	751.398	1	y6	24.01	2565689
AQFDTLQK	B2RA70	O-A_3	475.751	2	751.398	1	y6	23.82	4294164
AQFDTLQK	B2RA70	OXA_1	475.751	2	751.398	1	y6	33.93	42730668
AQFDTLQK	B2RA70	OXA_2	475.751	2	751.398	1	y6	34.3	31665434
AQFDTLQK	B2RA70	OXA_3	475.751	2	751.398	1	y6	33.98	55488328
AQFDTLQK	B2RA70	C_1	475.751	2	604.33	1	y5	23.72	461452
AQFDTLQK	B2RA70	C_2	475.751	2	604.33	1	y5	23.72	773205
AQFDTLQK	B2RA70	C_3	475.751	2	604.33	1	y5	22.16	1468316
AQFDTLQK	B2RA70	ACBP_1	475.751	2	604.33	1	y5	22.98	1071380
AQFDTLQK	B2RA70	ACBP_2	475.751	2	604.33	1	y5	22.32	1178109
AQFDTLQK	B2RA70	ACBP_3	475.751	2	604.33	1	y5	22.32	759017
AQFDTLQK	B2RA70	O-A_1	475.751	2	604.33	1	y5	23.07	1112137
AQFDTLQK	B2RA70	O-A_2	475.751	2	604.33	1	y5	24.01	721417
AQFDTLQK	B2RA70	O-A_3	475.751	2	604.33	1	y5	23.72	1105853
AQFDTLQK	B2RA70	OXA_1	475.751	2	604.33	1	y5	33.93	5064448
AQFDTLQK	B2RA70	OXA_2	475.751	2	604.33	1	y5	34.3	4686527
AQFDTLQK	B2RA70	OXA_3	475.751	2	604.33	1	y5	33.98	6045252
AQFDTLQK	B2RA70	C_1	475.751	2	489.303	1	y4	23.72	417152
AQFDTLQK	B2RA70	C_2	475.751	2	489.303	1	y4	23.72	757355
AQFDTLQK	B2RA70	C_3	475.751	2	489.303	1	y4	22.16	1894775
AQFDTLQK	B2RA70	ACBP_1	475.751	2	489.303	1	y4	22.88	1120131
AQFDTLQK	B2RA70	ACBP_2	475.751	2	489.303	1	y4	22.32	1027552
AQFDTLQK	B2RA70	ACBP_3	475.751	2	489.303	1	y4	22.32	882414
AQFDTLQK	B2RA70	O-A_1	475.751	2	489.303	1	y4	23.07	1379892
AQFDTLQK	B2RA70	O-A_2	475.751	2	489.303	1	y4	24.01	763039
AQFDTLQK	B2RA70	O-A_3	475.751	2	489.303	1	y4	23.82	1125622
AQFDTLQK	B2RA70	OXA_1	475.751	2	489.303	1	y4	33.83	4619812
AQFDTLQK	B2RA70	OXA_2	475.751	2	489.303	1	y4	34.3	4225645
AQFDTLQK	B2RA70	OXA_3	475.751	2	489.303	1	y4	33.88	4877468
ESADGLQGETQLLVSR	P46013	C_1	851.934	2	1300.72	1	y12	43.11	326799
ESADGLQGETQLLVSR	P46013	C_2	851.934	2	1300.72	1	y12	42.83	261531
ESADGLQGETQLLVSR	P46013	C_3	851.934	2	1300.72	1	y12	41.93	769356
ESADGLQGETQLLVSR	P46013	ACBP_1	851.934	2	1300.72	1	y12	42.64	1296678
ESADGLQGETQLLVSR	P46013	ACBP_2	851.934	2	1300.72	1	y12	41.61	763927
ESADGLQGETQLLVSR	P46013	ACBP_3	851.934	2	1300.72	1	y12	41.99	1067351
ESADGLQGETQLLVSR	P46013	O-A_1	851.934	2	1300.72	1	y12	42.55	411270
ESADGLQGETQLLVSR	P46013	O-A_2	851.934	2	1300.72	1	y12	43.2	447518
ESADGLQGETQLLVSR	P46013	O-A_3	851.934	2	1300.72	1	y12	43.3	346765
ESADGLQGETQLLVSR	P46013	OXA_1	851.934	2	1300.72	1	y12	42.08	945884
ESADGLQGETQLLVSR	P46013	OXA_2	851.934	2	1300.72	1	y12	42.55	983213
ESADGLQGETQLLVSR	P46013	OXA_3	851.934	2	1300.72	1	y12	42.16	944916
ESADGLQGETQLLVSR	P46013	C_1	851.934	2	1130.62	1	y10	43.11	1766889
ESADGLQGETQLLVSR	P46013	C_2	851.934	2	1130.62	1	y10	42.92	1626781
ESADGLQGETQLLVSR	P46013	C_3	851.934	2	1130.62	1	y10	41.93	4066146
ESADGLQGETQLLVSR	P46013	ACBP_1	851.934	2	1130.62	1	y10	42.64	4550326
ESADGLQGETQLLVSR	P46013	ACBP_2	851.934	2	1130.62	1	y10	41.61	3346612
ESADGLQGETQLLVSR	P46013	ACBP_3	851.934	2	1130.62	1	y10	41.99	5357965
ESADGLQGETQLLVSR	P46013	O-A_1	851.934	2	1130.62	1	y10	42.55	2847095
ESADGLQGETQLLVSR	P46013	O-A_2	851.934	2	1130.62	1	y10	43.11	2396038
ESADGLQGETQLLVSR	P46013	O-A_3	851.934	2	1130.62	1	y10	43.2	2057364
ESADGLQGETQLLVSR	P46013	OXA_1	851.934	2	1130.62	1	y10	42.08	4208736
ESADGLQGETQLLVSR	P46013	OXA_2	851.934	2	1130.62	1	y10	42.45	4851660
ESADGLQGETQLLVSR	P46013	OXA_3	851.934	2	1130.62	1	y10	42.16	4869943
ESADGLQGETQLLVSR	P46013	C_1	851.934	2	1002.56	1	y9	43.11	2444275
ESADGLQGETQLLVSR	P46013	C_2	851.934	2	1002.56	1	y9	42.92	2366936
ESADGLQGETQLLVSR	P46013	C_3	851.934	2	1002.56	1	y9	41.93	5755913
ESADGLQGETQLLVSR	P46013	ACBP_1	851.934	2	1002.56	1	y9	42.64	5920038
ESADGLQGETQLLVSR	P46013	ACBP_2	851.934	2	1002.56	1	y9	41.61	4516537
ESADGLQGETQLLVSR	P46013	ACBP_3	851.934	2	1002.56	1	y9	41.99	6583137
ESADGLQGETQLLVSR	P46013	O-A_1	851.934	2	1002.56	1	y9	42.55	4143331
ESADGLQGETQLLVSR	P46013	O-A_2	851.934	2	1002.56	1	y9	43.11	3643274
ESADGLQGETQLLVSR	P46013	O-A_3	851.934	2	1002.56	1	y9	43.2	2576600
ESADGLQGETQLLVSR	P46013	OXA_1	851.934	2	1002.56	1	y9	41.99	6348038
ESADGLQGETQLLVSR	P46013	OXA_2	851.934	2	1002.56	1	y9	42.45	7044576
ESADGLQGETQLLVSR	P46013	OXA_3	851.934	2	1002.56	1	y9	42.16	7537096
SPPPESVDTPTSTK	P46013	C_1	721.854	2	1161.56	1	y11	17.09	1100383
SPPPESVDTPTSTK	P46013	C_2	721.854	2	1161.56	1	y11	17.09	1225652
SPPPESVDTPTSTK	P46013	C_3	721.854	2	1161.56	1	y11	16.05	2017237
SPPPESVDTPTSTK	P46013	ACBP_1	721.854	2	1161.56	1	y11	16.62	3057987
SPPPESVDTPTSTK	P46013	ACBP_2	721.854	2	1161.56	1	y11	16.34	2968493
SPPPESVDTPTSTK	P46013	ACBP_3	721.854	2	1161.56	1	y11	15.97	2989914
SPPPESVDTPTSTK	P46013	O-A_1	721.854	2	1161.56	1	y11	16.53	2154462
SPPPESVDTPTSTK	P46013	O-A_2	721.854	2	1161.56	1	y11	17.09	1912786
SPPPESVDTPTSTK	P46013	O-A_3	721.854	2	1161.56	1	y11	17	2037483
SPPPESVDTPTSTK	P46013	OXA_1	721.854	2	1161.56	1	y11	16.34	3106140
SPPPESVDTPTSTK	P46013	OXA_2	721.854	2	1161.56	1	y11	15.97	2458596
SPPPESVDTPTSTK	P46013	OXA_3	721.854	2	1161.56	1	y11	16.13	2910007
SPPPESVDTPTSTK	P46013	C_1	721.854	2	935.468	1	y9	16.81	440552
SPPPESVDTPTSTK	P46013	C_2	721.854	2	935.468	1	y9	16.81	415630
SPPPESVDTPTSTK	P46013	C_3	721.854	2	935.468	1	y9	16.05	330825
SPPPESVDTPTSTK	P46013	ACBP_1	721.854	2	935.468	1	y9	16.62	750033
SPPPESVDTPTSTK	P46013	ACBP_2	721.854	2	935.468	1	y9	16.34	846747
SPPPESVDTPTSTK	P46013	ACBP_3	721.854	2	935.468	1	y9	16.06	695225
SPPPESVDTPTSTK	P46013	O-A_1	721.854	2	935.468	1	y9	16.53	426706
SPPPESVDTPTSTK	P46013	O-A_2	721.854	2	935.468	1	y9	17	547855
SPPPESVDTPTSTK	P46013	O-A_3	721.854	2	935.468	1	y9	17	586451
SPPPESVDTPTSTK	P46013	OXA_1	721.854	2	935.468	1	y9	16.44	728649
SPPPESVDTPTSTK	P46013	OXA_2	721.854	2	935.468	1	y9	16.06	636462
SPPPESVDTPTSTK	P46013	OXA_3	721.854	2	935.468	1	y9	16.22	635867
SPPPESVDTPTSTK	P46013	C_1	721.854	2	533.293	1	y5	16.81	1271475
SPPPESVDTPTSTK	P46013	C_2	721.854	2	533.293	1	y5	16.81	850139
SPPPESVDTPTSTK	P46013	C_3	721.854	2	533.293	1	y5	16.05	651659
SPPPESVDTPTSTK	P46013	ACBP_1	721.854	2	533.293	1	y5	16.72	1352507
SPPPESVDTPTSTK	P46013	ACBP_2	721.854	2	533.293	1	y5	16.34	1310457
SPPPESVDTPTSTK	P46013	ACBP_3	721.854	2	533.293	1	y5	16.06	927285
SPPPESVDTPTSTK	P46013	O-A_1	721.854	2	533.293	1	y5	16.53	820301
SPPPESVDTPTSTK	P46013	O-A_2	721.854	2	533.293	1	y5	16.9	1100963
SPPPESVDTPTSTK	P46013	O-A_3	721.854	2	533.293	1	y5	16.62	1330759
SPPPESVDTPTSTK	P46013	OXA_1	721.854	2	533.293	1	y5	16.44	1381975
SPPPESVDTPTSTK	P46013	OXA_2	721.854	2	533.293	1	y5	15.97	693640
SPPPESVDTPTSTK	P46013	OXA_3	721.854	2	533.293	1	y5	16.22	1195734
ELFQTPGHTEEAVAAGK	P46013	C_1	892.944	2	1267.63	1	y13	31.98	1331100
ELFQTPGHTEEAVAAGK	P46013	C_2	892.944	2	1267.63	1	y13	31.69	963875
ELFQTPGHTEEAVAAGK	P46013	C_3	892.944	2	1267.63	1	y13	30.45	2765257
ELFQTPGHTEEAVAAGK	P46013	ACBP_1	892.944	2	1267.63	1	y13	31.23	2842483
ELFQTPGHTEEAVAAGK	P46013	ACBP_2	892.944	2	1267.63	1	y13	30.66	2816565
ELFQTPGHTEEAVAAGK	P46013	ACBP_3	892.944	2	1267.63	1	y13	30.76	2852936
ELFQTPGHTEEAVAAGK	P46013	O-A_1	892.944	2	1267.63	1	y13	31.23	1840184
ELFQTPGHTEEAVAAGK	P46013	O-A_2	892.944	2	1267.63	1	y13	31.98	1666902
ELFQTPGHTEEAVAAGK	P46013	O-A_3	892.944	2	1267.63	1	y13	32.07	1423517
ELFQTPGHTEEAVAAGK	P46013	OXA_1	892.944	2	1267.63	1	y13	30.76	2309369
ELFQTPGHTEEAVAAGK	P46013	OXA_2	892.944	2	1267.63	1	y13	31.13	2242938
ELFQTPGHTEEAVAAGK	P46013	OXA_3	892.944	2	1267.63	1	y13	30.8	2783668
ELFQTPGHTEEAVAAGK	P46013	C_1	892.944	2	1166.58	1	y12	32.07	6302214
ELFQTPGHTEEAVAAGK	P46013	C_2	892.944	2	1166.58	1	y12	31.69	4810210
ELFQTPGHTEEAVAAGK	P46013	C_3	892.944	2	1166.58	1	y12	30.45	13090431
ELFQTPGHTEEAVAAGK	P46013	ACBP_1	892.944	2	1166.58	1	y12	31.23	13626989
ELFQTPGHTEEAVAAGK	P46013	ACBP_2	892.944	2	1166.58	1	y12	30.66	13710115
ELFQTPGHTEEAVAAGK	P46013	ACBP_3	892.944	2	1166.58	1	y12	30.66	14238609
ELFQTPGHTEEAVAAGK	P46013	O-A_1	892.944	2	1166.58	1	y12	31.32	8722039
ELFQTPGHTEEAVAAGK	P46013	O-A_2	892.944	2	1166.58	1	y12	31.98	8184759
ELFQTPGHTEEAVAAGK	P46013	O-A_3	892.944	2	1166.58	1	y12	32.07	7117128
ELFQTPGHTEEAVAAGK	P46013	OXA_1	892.944	2	1166.58	1	y12	30.66	10845660
ELFQTPGHTEEAVAAGK	P46013	OXA_2	892.944	2	1166.58	1	y12	31.13	10202021
ELFQTPGHTEEAVAAGK	P46013	OXA_3	892.944	2	1166.58	1	y12	30.8	13829069
ELFQTPGHTEEAVAAGK	P46013	C_1	892.944	2	1012.51	1	y10	31.98	526669
ELFQTPGHTEEAVAAGK	P46013	C_2	892.944	2	1012.51	1	y10	31.69	257056
ELFQTPGHTEEAVAAGK	P46013	C_3	892.944	2	1012.51	1	y10	30.45	1030052
ELFQTPGHTEEAVAAGK	P46013	ACBP_1	892.944	2	1012.51	1	y10	31.23	1043450
ELFQTPGHTEEAVAAGK	P46013	ACBP_2	892.944	2	1012.51	1	y10	30.57	1022328
ELFQTPGHTEEAVAAGK	P46013	ACBP_3	892.944	2	1012.51	1	y10	30.66	1080264
ELFQTPGHTEEAVAAGK	P46013	O-A_1	892.944	2	1012.51	1	y10	31.32	680941
ELFQTPGHTEEAVAAGK	P46013	O-A_2	892.944	2	1012.51	1	y10	31.98	544670
ELFQTPGHTEEAVAAGK	P46013	O-A_3	892.944	2	1012.51	1	y10	32.07	512398
ELFQTPGHTEEAVAAGK	P46013	OXA_1	892.944	2	1012.51	1	y10	30.66	713401
ELFQTPGHTEEAVAAGK	P46013	OXA_2	892.944	2	1012.51	1	y10	31.13	711146
ELFQTPGHTEEAVAAGK	P46013	OXA_3	892.944	2	1012.51	1	y10	30.8	1047071
DLFVELK	O75487	C_1	432.247	2	635.376	1	y5	46.39	14685864
DLFVELK	O75487	C_2	432.247	2	635.376	1	y5	46.2	18939904
DLFVELK	O75487	C_3	432.247	2	635.376	1	y5	44.76	27329504
DLFVELK	O75487	ACBP_1	432.247	2	635.376	1	y5	45.64	21914432
DLFVELK	O75487	ACBP_2	432.247	2	635.376	1	y5	44.24	19627374
DLFVELK	O75487	ACBP_3	432.247	2	635.376	1	y5	44.8	16882100
DLFVELK	O75487	O-A_1	432.247	2	635.376	1	y5	45.64	30516298
DLFVELK	O75487	O-A_2	432.247	2	635.376	1	y5	46.49	18600170
DLFVELK	O75487	O-A_3	432.247	2	635.376	1	y5	46.49	18539372
DLFVELK	O75487	OXA_1	432.247	2	635.376	1	y5	44.8	18135736
DLFVELK	O75487	OXA_2	432.247	2	635.376	1	y5	45.55	25352438
DLFVELK	O75487	OXA_3	432.247	2	635.376	1	y5	44.99	29277770
DLFVELK	O75487	C_1	432.247	2	147.113	1	y1	45.92	19655500
DLFVELK	O75487	C_2	432.247	2	147.113	1	y1	46.3	27568260
DLFVELK	O75487	C_3	432.247	2	147.113	1	y1	44.38	55823936
DLFVELK	O75487	ACBP_1	432.247	2	147.113	1	y1	45.27	41508004
DLFVELK	O75487	ACBP_2	432.247	2	147.113	1	y1	44.24	35682264
DLFVELK	O75487	ACBP_3	432.247	2	147.113	1	y1	44.8	28253214
DLFVELK	O75487	O-A_1	432.247	2	147.113	1	y1	45.18	58929168
DLFVELK	O75487	O-A_2	432.247	2	147.113	1	y1	46.49	28061560
DLFVELK	O75487	O-A_3	432.247	2	147.113	1	y1	46.11	39347392
DLFVELK	O75487	OXA_1	432.247	2	147.113	1	y1	44.43	33664452
DLFVELK	O75487	OXA_2	432.247	2	147.113	1	y1	45.08	57425600
DLFVELK	O75487	OXA_3	432.247	2	147.113	1	y1	44.62	62748040
DLFVELK	O75487	C_1	432.247	2	229.118	1	b2	46.39	14876149
DLFVELK	O75487	C_2	432.247	2	229.118	1	b2	46.3	23138526
DLFVELK	O75487	C_3	432.247	2	229.118	1	b2	44.66	37249316
DLFVELK	O75487	ACBP_1	432.247	2	229.118	1	b2	45.64	28537058
DLFVELK	O75487	ACBP_2	432.247	2	229.118	1	b2	44.24	24057350
DLFVELK	O75487	ACBP_3	432.247	2	229.118	1	b2	44.89	20423426
DLFVELK	O75487	O-A_1	432.247	2	229.118	1	b2	45.64	39490080
DLFVELK	O75487	O-A_2	432.247	2	229.118	1	b2	46.49	22154902
DLFVELK	O75487	O-A_3	432.247	2	229.118	1	b2	46.49	24359646
DLFVELK	O75487	OXA_1	432.247	2	229.118	1	b2	44.8	23837360
DLFVELK	O75487	OXA_2	432.247	2	229.118	1	b2	45.55	34737744
DLFVELK	O75487	OXA_3	432.247	2	229.118	1	b2	44.9	42954696
